# Supplementary material for: Development of a coupled geophysical–geothermal scheme for quantification of hydrates in gas hydrate-bearing permafrost sediments
Source: Royal Society of Chemistry journal article supplement (doi:10.1039/d1cp03086h), 2021-01-01
Supplement: d1cp03086h1.pdf [file d1cp03086h1.pdf]

## Electronic Supplementary Information for

# Development of a Coupled Geophysical-Geothermal Scheme for Quantification of Hydrates in Gas Hydrate-Bearing Permafrost Sediments

Mehرداد Vasheghani Farahani<sup>1,\*</sup>, Aliakbar Hassanpouryouzband<sup>2</sup>, Jinhai Yang<sup>1,\*†</sup>, Bahman Tohidi<sup>1</sup>

<sup>1</sup>Hydrates, Flow Assurance & Phase Equilibria Research Group, Institute of GeoEnergy Engineering, Heriot-Watt University, Edinburgh, EH14 4AS, United Kingdom

<sup>2</sup>School of Geosciences, University of Edinburgh, Grant Institute, West Main Road, Edinburgh, EH9 3JW, United Kingdom

\*Corresponding Authors: M.V. ([mv47@hw.ac.uk](mailto:mv47@hw.ac.uk)), J.Y. ([jyang3164@gmail.com](mailto:jyang3164@gmail.com))

†Now retired from Heriot-Watt University

The following data are available at Mendeley Data, <https://doi.org/10.17632/2zf6dsxkfw.1>:

1. Detailed experimental conditions and measured elastic wave velocities and ETC values at different effective overburden pressures (Section 4.1).
2. Detailed predicted and experimental saturations of the co-existing phases together with the PT conditions used for testing the performance of the coupled geophysical-geothermal scheme (Section 4.3).

## Supporting Information

**Table S1.** ETC and ETC ratio at unfrozen and frozen conditions, predicted to investigate sensitivity of the modified ETC model to the saturation and pore-scale habit of hydrates.

**Table S2.** ETC and elastic wave velocities determined by the rock-physics model (EMT-C) at frozen conditions, predicted to investigate sensitivity of the modified ETC model to the unfrozen water saturation at different hydrates distribution patterns.

**Table S3.** ETC and ETC ratio at unfrozen conditions and frozen conditions, predicted to investigate sensitivity of the modified ETC model to the hydrate-forced heave.

**Table S1.** ETC and ETC ratio at unfrozen and frozen conditions, predicted to investigate sensitivity of the modified ETC model to the saturation and pore-scale habit of hydrates.

| <b>ETC and ETC Ratio at Unfrozen Conditions</b> |                 |              |              |              |                |                  |
|-------------------------------------------------|-----------------|--------------|--------------|--------------|----------------|------------------|
| No.                                             | $\sigma$<br>(-) | $S_h$<br>(-) | $S_w$<br>(-) | $S_g$<br>(-) | ETC<br>(W/m.K) | ETC Ratio<br>(-) |
| A=N/2                                           |                 |              |              |              |                |                  |
|                                                 | -               | 0.00         | 0.60         | 0.40         | 2.319          | 1.000            |
| 1                                               | 1               | 0.04         | 0.56         | 0.40         | 2.246          | 0.968            |
| 2                                               | 5               | 0.20         | 0.40         | 0.40         | 2.020          | 0.871            |
| 3                                               | 10              | 0.39         | 0.21         | 0.40         | 1.918          | 0.827            |
| 4                                               | 15              | 0.52         | 0.08         | 0.40         | 1.904          | 0.821            |
| 5                                               | 20              | 0.60         | 0.00         | 0.40         | 1.903          | 0.821            |
| A=N/4                                           |                 |              |              |              |                |                  |
|                                                 | -               | 0.00         | 0.60         | 0.40         | 2.319          | 1.000            |
| 6                                               | 1               | 0.02         | 0.58         | 0.40         | 2.298          | 0.991            |
| 7                                               | 5               | 0.10         | 0.50         | 0.40         | 2.225          | 0.959            |
| 8                                               | 10              | 0.21         | 0.39         | 0.40         | 2.151          | 0.927            |
| 9                                               | 15              | 0.33         | 0.27         | 0.40         | 2.100          | 0.905            |
| 10                                              | 20              | 0.51         | 0.09         | 0.40         | 2.074          | 0.894            |
| 11                                              | 25              | 0.55         | 0.05         | 0.40         | 2.068          | 0.892            |
| A=N/6                                           |                 |              |              |              |                |                  |
|                                                 | -               | 0.00         | 0.60         | 0.40         | 2.319          | 1.000            |
| 12                                              | 1               | 0.01         | 0.59         | 0.40         | 2.311          | 0.996            |
| 13                                              | 5               | 0.05         | 0.55         | 0.40         | 2.280          | 0.983            |
| 14                                              | 10              | 0.10         | 0.50         | 0.40         | 2.247          | 0.969            |
| 15                                              | 15              | 0.16         | 0.44         | 0.40         | 2.221          | 0.957            |
| 16                                              | 20              | 0.27         | 0.33         | 0.40         | 2.202          | 0.949            |
| 17                                              | 25              | 0.39         | 0.21         | 0.40         | 2.190          | 0.944            |
| 18                                              | 30              | 0.41         | 0.19         | 0.40         | 2.184          | 0.942            |
| 19                                              | 35              | 0.42         | 0.18         | 0.40         | 2.181          | 0.941            |
| A=N/8                                           |                 |              |              |              |                |                  |
|                                                 | -               | 0.00         | 0.60         | 0.40         | 2.319          | 1.000            |
| 20                                              | 1               | 0.01         | 0.60         | 0.40         | 2.316          | 0.999            |
| 21                                              | 5               | 0.02         | 0.58         | 0.40         | 2.302          | 0.992            |
| 22                                              | 10              | 0.05         | 0.55         | 0.40         | 2.287          | 0.986            |
| 23                                              | 15              | 0.08         | 0.52         | 0.40         | 2.273          | 0.980            |
| 24                                              | 20              | 0.13         | 0.47         | 0.40         | 2.262          | 0.975            |
| 25                                              | 25              | 0.22         | 0.38         | 0.40         | 2.253          | 0.971            |
| 26                                              | 30              | 0.28         | 0.32         | 0.40         | 2.247          | 0.969            |
| 27                                              | 35              | 0.30         | 0.30         | 0.40         | 2.244          | 0.968            |
| 28                                              | 40              | 0.31         | 0.29         | 0.40         | 2.242          | 0.967            |

**ETC and ETC Ratio at Frozen Conditions**

| No    | $\sigma$<br>(-) | $S_h$<br>(-) | $S_i$<br>(-) | $S_{uw}$<br>(-) | $S_g$<br>(-) | ETC<br>(W/m.K) | ETC Ratio<br>(-) |
|-------|-----------------|--------------|--------------|-----------------|--------------|----------------|------------------|
| A=N/2 |                 |              |              |                 |              |                |                  |
|       | -               | 0.00         | 0.57         | 0.10            | 0.33         | 3.571          | 1.000            |
| 1     | 1               | 0.05         | 0.52         | 0.10            | 0.33         | 3.179          | 0.890            |
| 2     | 5               | 0.21         | 0.36         | 0.10            | 0.33         | 2.355          | 0.659            |
| 3     | 10              | 0.38         | 0.19         | 0.10            | 0.33         | 2.059          | 0.577            |
| 4     | 15              | 0.52         | 0.05         | 0.10            | 0.33         | 2.022          | 0.566            |
| 5     | 20              | 0.57         | 0.00         | 0.10            | 0.33         | 2.019          | 0.565            |
| A=N/4 |                 |              |              |                 |              |                |                  |
|       | -               | 0.00         | 0.57         | 0.10            | 0.33         | 3.571          | 1.000            |
| 6     | 1               | 0.03         | 0.54         | 0.10            | 0.33         | 3.370          | 0.944            |
| 7     | 5               | 0.12         | 0.45         | 0.10            | 0.33         | 2.887          | 0.808            |
| 8     | 10              | 0.24         | 0.33         | 0.10            | 0.33         | 2.579          | 0.722            |
| 9     | 15              | 0.39         | 0.18         | 0.10            | 0.33         | 2.401          | 0.672            |
| 10    | 20              | 0.52         | 0.05         | 0.10            | 0.33         | 2.334          | 0.654            |
| 11    | 25              | 0.54         | 0.03         | 0.10            | 0.33         | 2.324          | 0.651            |
| A=N/6 |                 |              |              |                 |              |                |                  |
|       | -               | 0.00         | 0.57         | 0.10            | 0.33         | 3.571          | 1.000            |
| 12    | 1               | 0.01         | 0.56         | 0.10            | 0.33         | 3.473          | 0.973            |
| 13    | 5               | 0.06         | 0.51         | 0.10            | 0.33         | 3.241          | 0.908            |
| 14    | 10              | 0.12         | 0.45         | 0.10            | 0.33         | 3.096          | 0.867            |
| 15    | 15              | 0.20         | 0.37         | 0.10            | 0.33         | 2.992          | 0.838            |
| 16    | 20              | 0.33         | 0.24         | 0.10            | 0.33         | 2.911          | 0.815            |
| 17    | 25              | 0.42         | 0.15         | 0.10            | 0.33         | 2.858          | 0.800            |
| 18    | 30              | 0.44         | 0.14         | 0.10            | 0.33         | 2.834          | 0.794            |
| 19    | 35              | 0.44         | 0.13         | 0.10            | 0.33         | 2.820          | 0.790            |
| A=N/8 |                 |              |              |                 |              |                |                  |
|       | -               | 0.00         | 0.57         | 0.10            | 0.33         | 3.571          | 1.000            |
| 20    | 1               | 0.01         | 0.56         | 0.10            | 0.33         | 3.526          | 0.987            |
| 21    | 5               | 0.04         | 0.53         | 0.10            | 0.33         | 3.401          | 0.952            |
| 22    | 10              | 0.07         | 0.50         | 0.10            | 0.33         | 3.320          | 0.930            |
| 23    | 15              | 0.12         | 0.45         | 0.10            | 0.33         | 3.265          | 0.914            |
| 24    | 20              | 0.19         | 0.38         | 0.10            | 0.33         | 3.212          | 0.899            |
| 25    | 25              | 0.29         | 0.28         | 0.10            | 0.33         | 3.164          | 0.886            |
| 26    | 30              | 0.32         | 0.25         | 0.10            | 0.33         | 3.138          | 0.879            |
| 27    | 35              | 0.33         | 0.24         | 0.10            | 0.33         | 3.123          | 0.875            |
| 28    | 40              | 0.34         | 0.23         | 0.10            | 0.33         | 3.113          | 0.872            |

**Table S2.** ETC and elastic wave velocities determined by the rock-physics model (EMT-C) at frozen conditions, predicted to investigate sensitivity of the modified ETC model to the unfrozen water saturation at different hydrates distribution patterns.

| <b>ETC</b> |                 |              |                |     |                 |              |                |     |                 |              |                |
|------------|-----------------|--------------|----------------|-----|-----------------|--------------|----------------|-----|-----------------|--------------|----------------|
| No.        | $S_{uw}$<br>(-) | $S_h$<br>(-) | ETC<br>(W/m.K) | No. | $S_{uw}$<br>(-) | $S_h$<br>(-) | ETC<br>(W/m.K) | No. | $S_{uw}$<br>(-) | $S_h$<br>(-) | ETC<br>(W/m.K) |
| A=N/8      |                 |              |                |     |                 |              |                |     |                 |              |                |
| 1          | 0.00            | 0.00         | 3.929          | 1   | 0.03            | 0.00         | 3.839          | 1   | 0.09            | 0.00         | 3.670          |
| 2          | 0.00            | 0.12         | 3.567          | 2   | 0.03            | 0.12         | 3.479          | 2   | 0.09            | 0.12         | 3.312          |
| 3          | 0.00            | 0.25         | 3.495          | 3   | 0.03            | 0.25         | 3.407          | 3   | 0.09            | 0.25         | 3.240          |
| 4          | 0.00            | 0.36         | 3.426          | 4   | 0.03            | 0.36         | 3.342          | 4   | 0.09            | 0.36         | 3.180          |
| A=N/6      |                 |              |                |     |                 |              |                |     |                 |              |                |
| 1          | 0.00            | 0.00         | 3.929          | 1   | 0.03            | 0.00         | 3.839          | 1   | 0.09            | 0.00         | 3.670          |
| 2          | 0.00            | 0.12         | 3.402          | 2   | 0.03            | 0.12         | 3.317          | 2   | 0.09            | 0.12         | 3.153          |
| 3          | 0.00            | 0.25         | 3.269          | 3   | 0.03            | 0.25         | 3.183          | 3   | 0.09            | 0.25         | 3.016          |
| 4          | 0.00            | 0.36         | 3.209          | 4   | 0.03            | 0.36         | 3.123          | 4   | 0.09            | 0.36         | 2.955          |
| A=N/4      |                 |              |                |     |                 |              |                |     |                 |              |                |
| 1          | 0.00            | 0.00         | 3.929          | 1   | 0.03            | 0.00         | 3.839          | 1   | 0.09            | 0.00         | 3.670          |
| 2          | 0.00            | 0.12         | 3.154          | 2   | 0.03            | 0.12         | 3.078          | 2   | 0.09            | 0.12         | 2.936          |
| 3          | 0.00            | 0.25         | 2.789          | 3   | 0.03            | 0.25         | 2.716          | 3   | 0.09            | 0.25         | 2.581          |
| 4          | 0.00            | 0.36         | 2.672          | 4   | 0.03            | 0.36         | 2.599          | 4   | 0.09            | 0.36         | 2.462          |

| <b>Elastic wave velocities</b> |              |                 |                 |
|--------------------------------|--------------|-----------------|-----------------|
| No.                            | $S_h$<br>(-) | $v_p$<br>(km/s) | $v_s$<br>(km/s) |
| $S_{uw}=0.00$                  |              |                 |                 |
| 1                              | 0.00         | 3.94            | 2.23            |
| 2                              | 0.12         | 3.94            | 2.23            |
| 3                              | 0.25         | 3.94            | 2.23            |
| 4                              | 0.36         | 3.94            | 2.23            |
| $S_{uw}=0.03$                  |              |                 |                 |
| 1                              | 0.00         | 3.92            | 2.21            |
| 2                              | 0.12         | 3.92            | 2.21            |
| 3                              | 0.25         | 3.92            | 2.21            |
| 4                              | 0.36         | 3.92            | 2.21            |
| $S_{uw}=0.09$                  |              |                 |                 |
| 1                              | 0.00         | 3.87            | 2.19            |
| 2                              | 0.12         | 3.87            | 2.19            |
| 3                              | 0.25         | 3.87            | 2.19            |
| 4                              | 0.36         | 3.87            | 2.19            |

**Table S3.** ETC and ETC ratio at unfrozen conditions and frozen conditions, predicted to investigate sensitivity of the modified ETC model to the hydrate-forced heave.

| <b>ETC and ETC Ratio at Unfrozen Conditions</b> |                |              |              |              |                |                  |
|-------------------------------------------------|----------------|--------------|--------------|--------------|----------------|------------------|
| No.                                             | $\rho$<br>(LL) | $S_h$<br>(-) | $S_w$<br>(-) | $S_g$<br>(-) | ETC<br>(W/m.K) | ETC Ratio<br>(-) |
| <i>h</i> = 2 LL                                 |                |              |              |              |                |                  |
| 1                                               | 48             | 0.60         | 0.00         | 0.40         | 1.185          | 0.623            |
| 2                                               | 32             | 0.60         | 0.00         | 0.40         | 1.554          | 0.817            |
| 3                                               | 16             | 0.60         | 0.00         | 0.40         | 1.830          | 0.962            |
| -                                               | 0              | 0.60         | 0.00         | 0.40         | 1.903          | 1.000            |
| <i>h</i> = 4 LL                                 |                |              |              |              |                |                  |
| 4                                               | 48             | 0.60         | 0.00         | 0.40         | 1.001          | 0.526            |
| 5                                               | 32             | 0.60         | 0.00         | 0.40         | 1.444          | 0.759            |
| 6                                               | 16             | 0.60         | 0.00         | 0.40         | 1.811          | 0.952            |
| -                                               | 0              | 0.60         | 0.00         | 0.40         | 1.903          | 1.000            |
| <i>h</i> = 6 LL                                 |                |              |              |              |                |                  |
| 7                                               | 48             | 0.60         | 0.00         | 0.40         | 0.911          | 0.479            |
| 8                                               | 32             | 0.60         | 0.00         | 0.40         | 1.384          | 0.727            |
| 9                                               | 16             | 0.60         | 0.00         | 0.40         | 1.796          | 0.944            |
| -                                               | 0              | 0.60         | 0.00         | 0.40         | 1.903          | 1.000            |

  

| <b>ETC and ETC Ratio at Frozen Conditions</b> |                |              |              |                 |              |                |                  |
|-----------------------------------------------|----------------|--------------|--------------|-----------------|--------------|----------------|------------------|
| No.                                           | $\rho$<br>(LL) | $S_h$<br>(-) | $S_i$<br>(-) | $S_{uw}$<br>(-) | $S_g$<br>(-) | ETC<br>(W/m.K) | ETC Ratio<br>(-) |
| <i>h</i> = 2 LL                               |                |              |              |                 |              |                |                  |
| 1                                             | 48             | 0.10         | 0.42         | 0.08            | 0.40         | 1.419          | 0.400            |
| 2                                             | 32             | 0.10         | 0.42         | 0.08            | 0.40         | 2.172          | 0.612            |
| 3                                             | 16             | 0.10         | 0.42         | 0.08            | 0.40         | 3.245          | 0.915            |
| -                                             | 0              | 0.10         | 0.42         | 0.08            | 0.40         | 3.546          | 1.000            |
| <i>h</i> = 4 LL                               |                |              |              |                 |              |                |                  |
| 4                                             | 48             | 0.10         | 0.42         | 0.08            | 0.40         | 1.128          | 0.318            |
| 5                                             | 32             | 0.10         | 0.42         | 0.08            | 0.40         | 1.978          | 0.558            |
| 6                                             | 16             | 0.10         | 0.42         | 0.08            | 0.40         | 3.214          | 0.906            |
| -                                             | 0              | 0.10         | 0.42         | 0.08            | 0.40         | 3.546          | 1.000            |
| <i>h</i> = 6 LL                               |                |              |              |                 |              |                |                  |
| 7                                             | 48             | 0.10         | 0.42         | 0.08            | 0.40         | 1.004          | 0.283            |
| 8                                             | 32             | 0.10         | 0.42         | 0.08            | 0.40         | 1.888          | 0.532            |
| 9                                             | 16             | 0.10         | 0.42         | 0.08            | 0.40         | 3.189          | 0.899            |
| -                                             | 0              | 0.10         | 0.42         | 0.08            | 0.40         | 3.546          | 1.000            |
